# Supplementary material for: Extensive paternal mtDNA leakage in natural populations of Drosophila melanogaster
Source: PubMed Central journal article supplement (PMC3659417; doi:10.1111/mec.12256), 2013-03-04

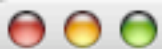

# Traces from Unassembled Samples

Print Previous Feature Next Feature Colors Bases <-> Transl. Next Frame Mask Matches Help

X
TTTTTAT
r
GTTATACC TATTATAATTGGTGGATTTGGAAATTGATTAGTGCCTTTAATATTAGGTGCTCC TG ATATAGCATTCCCACG AATAAATAATAAAGATTTT GACT
w
CTACC

Kr6\_48F.abd      40      50      60      70      80      90      100      110      120      130      14

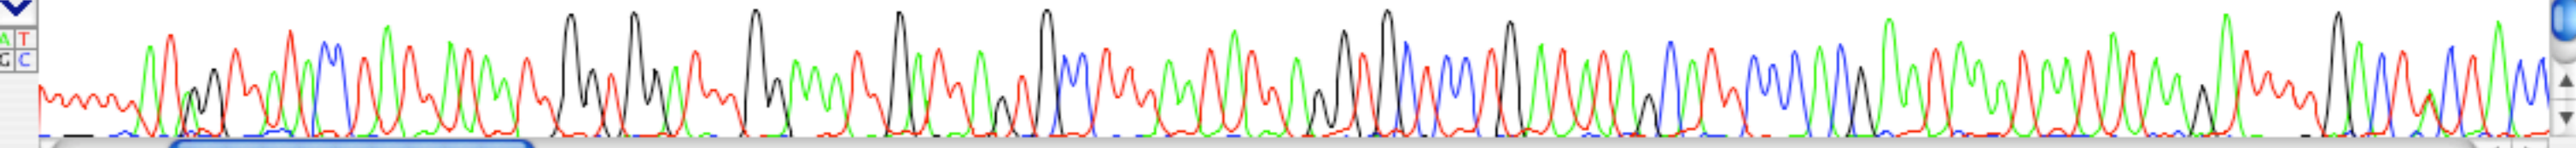

Supplement: mec0022-2106-SD1.pdf [file mec0022-2106-SD1.pdf]
